# Supplementary material
Source: Research Square preprint supplement (doi:10.21203/rs.3.rs-9414766/v1)
Supplement: Supplementary file 1 [file 66549ceb98b9d7133897b6fb.docx]

### **Supplementary Table S1**

**Variant Allele Frequency Distribution of Somatic Pharmacogene Loss-of-Function Variants Across TCGA MC3 Tumour Types**

*VAF distribution of all 2,611 tumour-gene somatic LOF events across four CPIC pharmacogenes and 33 TCGA tumour types. VAF tiers: subclonal (VAF < 0.15), intermediate (VAF 0.15–0.35), clonal (VAF > 0.35). Median VAF and interquartile range (IQR) computed per pharmacogene per cohort. Tumour types are ordered by total LOF event count (descending). This table underpins the VAF stratification described in Methods §2.4 and the sensitivity analysis presented in Supplementary Table S2.*

| **TCGA Cohort** | **Tumour Type (Full Name)** | **Pharmacogene** | **Total LOF Events (n)** | **Median VAF** | **IQR (Q1–Q3)** | **Subclonal n (VAF <0.15)** | **Subclonal %** | **Intermediate n (VAF 0.15–0.35)** | **Intermediate %** | **Clonal n (VAF >0.35)** | **Clonal %** |
| --- | --- | --- | --- | --- | --- | --- | --- | --- | --- | --- | --- |
| COAD | Colon Adenocarcinoma | DPYD | 283 | 0.41 | 0.28–0.56 | 28 | 9.9 | 71 | 25.1 | 184 | 65.0 |
| COAD | Colon Adenocarcinoma | CYP2D6 | 148 | 0.38 | 0.24–0.53 | 19 | 12.8 | 44 | 29.7 | 85 | 57.4 |
| COAD | Colon Adenocarcinoma | CYP2C19 | 86 | 0.36 | 0.22–0.51 | 11 | 12.8 | 27 | 31.4 | 48 | 55.8 |
| COAD | Colon Adenocarcinoma | TPMT | 44 | 0.33 | 0.19–0.48 | 6 | 13.6 | 16 | 36.4 | 22 | 50.0 |
| STAD | Stomach Adenocarcinoma | CYP2D6 | 172 | 0.37 | 0.23–0.52 | 22 | 12.8 | 53 | 30.8 | 97 | 56.4 |
| STAD | Stomach Adenocarcinoma | CYP2C19 | 109 | 0.35 | 0.21–0.49 | 15 | 13.8 | 36 | 33.0 | 58 | 53.2 |
| STAD | Stomach Adenocarcinoma | DPYD | 79 | 0.33 | 0.20–0.47 | 11 | 13.9 | 27 | 34.2 | 41 | 51.9 |
| STAD | Stomach Adenocarcinoma | TPMT | 31 | 0.30 | 0.18–0.44 | 5 | 16.1 | 12 | 38.7 | 14 | 45.2 |
| UCEC | Uterine Corpus Endometrial Carcinoma | CYP2D6 | 144 | 0.39 | 0.25–0.54 | 16 | 11.1 | 43 | 29.9 | 85 | 59.0 |
| UCEC | Uterine Corpus Endometrial Carcinoma | CYP2C19 | 89 | 0.37 | 0.23–0.52 | 11 | 12.4 | 28 | 31.5 | 50 | 56.2 |
| UCEC | Uterine Corpus Endometrial Carcinoma | DPYD | 49 | 0.34 | 0.21–0.48 | 7 | 14.3 | 17 | 34.7 | 25 | 51.0 |
| UCEC | Uterine Corpus Endometrial Carcinoma | TPMT | 25 | 0.31 | 0.19–0.45 | 4 | 16.0 | 9 | 36.0 | 12 | 48.0 |
| LUAD | Lung Adenocarcinoma | CYP2D6 | 112 | 0.34 | 0.21–0.49 | 16 | 14.3 | 37 | 33.0 | 59 | 52.7 |
| LUAD | Lung Adenocarcinoma | CYP2C19 | 65 | 0.32 | 0.19–0.46 | 10 | 15.4 | 23 | 35.4 | 32 | 49.2 |
| LUAD | Lung Adenocarcinoma | DPYD | 35 | 0.30 | 0.18–0.44 | 6 | 17.1 | 13 | 37.1 | 16 | 45.7 |
| LUAD | Lung Adenocarcinoma | TPMT | 20 | 0.28 | 0.16–0.42 | 4 | 20.0 | 8 | 40.0 | 8 | 40.0 |
| SKCM | Skin Cutaneous Melanoma | CYP2D6 | 104 | 0.36 | 0.22–0.51 | 13 | 12.5 | 33 | 31.7 | 58 | 55.8 |
| SKCM | Skin Cutaneous Melanoma | CYP2C19 | 56 | 0.34 | 0.20–0.48 | 8 | 14.3 | 19 | 33.9 | 29 | 51.8 |
| SKCM | Skin Cutaneous Melanoma | DPYD | 37 | 0.31 | 0.19–0.45 | 6 | 16.2 | 14 | 37.8 | 17 | 45.9 |
| SKCM | Skin Cutaneous Melanoma | TPMT | 17 | 0.29 | 0.17–0.43 | 3 | 17.6 | 7 | 41.2 | 7 | 41.2 |
| BLCA | Bladder Urothelial Carcinoma | CYP2D6 | 79 | 0.35 | 0.21–0.50 | 11 | 13.9 | 26 | 32.9 | 42 | 53.2 |
| BLCA | Bladder Urothelial Carcinoma | CYP2C19 | 65 | 0.33 | 0.20–0.47 | 10 | 15.4 | 23 | 35.4 | 32 | 49.2 |
| BLCA | Bladder Urothelial Carcinoma | DPYD | 43 | 0.31 | 0.18–0.45 | 7 | 16.3 | 16 | 37.2 | 20 | 46.5 |
| BLCA | Bladder Urothelial Carcinoma | TPMT | 22 | 0.28 | 0.16–0.42 | 4 | 18.2 | 9 | 40.9 | 9 | 40.9 |
| GBM | Glioblastoma Multiforme | CYP2D6 | 63 | 0.33 | 0.20–0.47 | 9 | 14.3 | 22 | 34.9 | 32 | 50.8 |
| GBM | Glioblastoma Multiforme | TPMT | 56 | 0.36 | 0.22–0.51 | 7 | 12.5 | 18 | 32.1 | 31 | 55.4 |
| GBM | Glioblastoma Multiforme | CYP2C19 | 52 | 0.31 | 0.18–0.45 | 8 | 15.4 | 19 | 36.5 | 25 | 48.1 |
| GBM | Glioblastoma Multiforme | DPYD | 18 | 0.28 | 0.16–0.41 | 4 | 22.2 | 7 | 38.9 | 7 | 38.9 |
| LAML | Acute Myeloid Leukaemia | TPMT | 82 | 0.43 | 0.30–0.58 | 8 | 9.8 | 19 | 23.2 | 55 | 67.1 |
| LAML | Acute Myeloid Leukaemia | CYP2D6 | 44 | 0.38 | 0.24–0.53 | 6 | 13.6 | 14 | 31.8 | 24 | 54.5 |
| LAML | Acute Myeloid Leukaemia | CYP2C19 | 42 | 0.36 | 0.22–0.51 | 6 | 14.3 | 14 | 33.3 | 22 | 52.4 |
| LAML | Acute Myeloid Leukaemia | DPYD | 28 | 0.33 | 0.20–0.47 | 4 | 14.3 | 10 | 35.7 | 14 | 50.0 |
| BRCA | Breast Invasive Carcinoma | CYP2D6 | 87 | 0.33 | 0.20–0.47 | 13 | 14.9 | 30 | 34.5 | 44 | 50.6 |
| BRCA | Breast Invasive Carcinoma | CYP2C19 | 47 | 0.31 | 0.18–0.45 | 8 | 17.0 | 17 | 36.2 | 22 | 46.8 |
| BRCA | Breast Invasive Carcinoma | DPYD | 33 | 0.29 | 0.17–0.43 | 6 | 18.2 | 13 | 39.4 | 14 | 42.4 |
| BRCA | Breast Invasive Carcinoma | TPMT | 15 | 0.27 | 0.15–0.40 | 3 | 20.0 | 6 | 40.0 | 6 | 40.0 |
| PRAD | Prostate Adenocarcinoma | CYP2D6 | 56 | 0.31 | 0.18–0.45 | 9 | 16.1 | 21 | 37.5 | 26 | 46.4 |
| PRAD | Prostate Adenocarcinoma | CYP2C19 | 36 | 0.29 | 0.17–0.43 | 6 | 16.7 | 14 | 38.9 | 16 | 44.4 |
| PRAD | Prostate Adenocarcinoma | DPYD | 16 | 0.27 | 0.15–0.40 | 3 | 18.8 | 7 | 43.8 | 6 | 37.5 |
| PRAD | Prostate Adenocarcinoma | TPMT | 10 | 0.25 | 0.14–0.38 | 2 | 20.0 | 4 | 40.0 | 4 | 40.0 |
| **All remaining TCGA cohorts (23 types)** | **Aggregate of cohorts not individually listed** | **All genes** | **331** | **0.31** | **0.18–0.45** | **54** | **16.3** | **124** | **37.5** | **153** | **46.2** |
| **Pan-cancer total** | **All 33 cohorts** | **All four genes** | **2,611** | **0.36** | **0.22–0.51** | **323** | **12.4** | **813** | **31.1** | **1,475** | **56.5** |

*LOF events are counted at the tumour-gene level (one event per tumour per gene regardless of allelic multiplicity within the same gene). VAF values are derived directly from the TCGA MC3 MAF fields t_alt_count / (t_alt_count + t_ref_count) without tumour purity correction; purity-corrected cancer cell fraction estimates were used qualitatively to contextualise tier thresholds where TCGA purity data were available (ABSOLUTE algorithm outputs). Rows showing fewer than 10 total LOF events in individually named cohorts are aggregated into the final row to avoid reporting instability. Subclonal, intermediate, and clonal percentages within each row sum to 100% (rounding may cause minor deviation). Cohorts shown individually correspond to the ten tumour types presented in Table 2 of the main manuscript. VAF, Variant Allele Frequency; IQR, Interquartile Range; LOF, Loss-of-Function; TCGA, The Cancer Genome Atlas; MC3, Multi-Center Mutation Calling; MAF, Mutation Annotation Format; Q1, first quartile; Q3, third quartile.*

###

### **Supplementary Table S2**

**Sensitivity Analysis: Somatic Pharmacogene LOF Disruption Frequencies Restricted to Clonal Events (VAF > 0.35)**

*Comparison of pan-cancer and tumour-type-specific LOF frequencies under the primary analysis (all LOF, any VAF) versus sensitivity analysis restricted to clonal LOF events (VAF > 0.35). Clonal threshold reflects variants present in the dominant tumour clone, adjusted for tumour purity where TCGA estimates were available. FDR correction applied across all 33 × 4 comparisons within each analysis tier.*

| **Tumour Type** | **CYP2D6 LOF % (All VAF)** | **CYP2D6 LOF % (VAF >0.35)** | **CYP2C19 LOF % (All VAF)** | **CYP2C19 LOF % (VAF >0.35)** | **DPYD LOF % (All VAF)** | **DPYD LOF % (VAF >0.35)** | **TPMT LOF % (All VAF)** | **TPMT LOF % (VAF >0.35)** | **≥1 Gene % (All VAF)** | **≥1 Gene % (VAF >0.35)** |
| --- | --- | --- | --- | --- | --- | --- | --- | --- | --- | --- |
| COAD | 14.7 | 11.2 | 8.5 | 6.3 | 22.3 ★ | 17.8 ★ | 4.4 | 3.1 | 42.8 ★ | 34.2 ★ |
| STAD | 18.4 | 14.1 | 11.7 | 8.9 | 6.2 | 4.8 | 3.1 | 2.2 | 34.1 | 27.4 |
| UCEC | 15.9 | 12.3 | 9.8 | 7.4 | 5.4 | 4.1 | 2.8 | 1.9 | 29.6 | 23.1 |
| LUAD | 12.3 | 9.4 | 7.1 | 5.5 | 3.8 | 2.9 | 2.2 | 1.6 | 22.4 | 17.1 |
| SKCM | 11.8 | 9.1 | 6.4 | 4.9 | 4.1 | 3.2 | 1.9 | 1.4 | 21.7 | 16.6 |
| BLCA | 8.9 | 6.8 | 7.3 | 5.6 | 4.9 | 3.7 | 2.5 | 1.8 | 20.1 | 15.4 |
| GBM | 7.2 | 5.5 | 5.9 | 4.5 | 2.1 | 1.6 | 6.4 | 4.9 | 18.8 | 14.3 |
| LAML | 5.1 | 3.9 | 4.8 | 3.7 | 3.2 | 2.5 | 14.9 ★ | 12.1 ★ | 26.1 ★ | 20.7 ★ |
| BRCA | 9.6 | 7.4 | 5.2 | 4.0 | 3.6 | 2.8 | 1.7 | 1.2 | 17.3 | 13.2 |
| PRAD | 6.4 | 4.9 | 4.1 | 3.2 | 1.8 | 1.4 | 1.2 | 0.9 | 12.3 | 9.4 |
| **Pan-cancer aggregate** | **10.7** | **8.2** | **7.2** | **5.5** | **5.9** | **4.6** | **3.4** | **2.6** | **23.8** | **18.4** |

★ Significantly elevated vs. pan-cancer aggregate (Fisher's exact test, Benjamini–Hochberg FDR q < 0.05) within each analysis tier independently. LOF, Loss-of-Function; VAF, Variant Allele Frequency; COAD, Colon Adenocarcinoma; STAD, Stomach Adenocarcinoma; UCEC, Uterine Corpus Endometrial Carcinoma; LUAD, Lung Adenocarcinoma; SKCM, Skin Cutaneous Melanoma; BLCA, Bladder Urothelial Carcinoma; GBM, Glioblastoma Multiforme; LAML, Acute Myeloid Leukaemia; BRCA, Breast Invasive Carcinoma; PRAD, Prostate Adenocarcinoma.

**Key findings:** Primary frequency estimates decrease by a mean of 21.8% when restricted to clonal events (VAF > 0.35), confirming that subclonal LOF events contribute meaningfully to the overall burden but that the clinically significant patterns — COAD/DPYD and LAML/TPMT elevation — remain statistically robust even under the conservative clonal-only threshold.

### **Supplementary Table S3**

**TCGA Clinical Annotation Cross-Reference: Documented Drug Exposure Among Potentially Actionable Tumours**

*Cross-reference of TCGA clinical XML drug therapy fields against potentially actionable tumours (somatic LOF in a CPIC Level A pharmacogene relevant to standard-of-care drug for that cancer type). Drug exposure status was extracted from TCGA clinical data fields drug_name and drug_therapy. Tumours with missing or incomplete drug records are classified as "Unknown exposure." This analysis is descriptive and intended to estimate the proportion of pharmacogene-LOF tumours with documented exposure to the affected drug class, not to establish pharmacokinetic or toxicity associations.*

| **Gene–Drug Pair** | **Cancer Type** | **Total Tumours with Somatic LOF (n)** | **Documented Drug Exposure (n)** | **Documented Drug Exposure (%)** | **No Documented Exposure (n)** | **Exposure Unknown / Record Missing (n)** | **Clinical Significance** |
| --- | --- | --- | --- | --- | --- | --- | --- |
| DPYD / 5-FU or Capecitabine | COAD | 283 | 194 | 68.6 | 31 | 58 | Tumour-directed; high priority |
| DPYD / 5-FU or Capecitabine | STAD | 79 | 51 | 64.6 | 11 | 17 | Tumour-directed; high priority |
| DPYD / 5-FU or Capecitabine | BRCA | 47 | 22 | 46.8 | 14 | 11 | Tumour-directed; moderate priority |
| DPYD / 5-FU or Capecitabine | Other types | 238 | 87 | 36.6 | 74 | 77 | Variable; context-dependent |
| TPMT / Thiopurines (6-MP, AZA, TG) | LAML | 82 | 58 | 70.7 | 9 | 15 | Tumour-directed; high priority |
| TPMT / Thiopurines | Other haematologic | 41 | 19 | 46.3 | 12 | 10 | Tumour-directed; moderate priority |
| TPMT / Thiopurines | Non-haematologic | 250 | 14 | 5.6 | 189 | 47 | Low direct relevance |
| CYP2D6 / Tamoxifen | BRCA | 118 | 74 | 62.7 | 27 | 17 | Tumour-directed; high priority |
| CYP2D6 / Ondansetron or Tropisetron | All types (CINV) | 1,174 | 312 | 26.6 | 241 | 621 | Supportive care; record gaps expected |
| CYP2C19 / Clopidogrel | All types | 790 | 89 | 11.3 | 312 | 389 | Comorbidity; rarely documented in TCGA |
| CYP2C19 / Proton Pump Inhibitors | All types | 790 | 143 | 18.1 | 271 | 376 | Supportive care; incomplete records |
| **All pairs combined** | **All types** | **2,984** | **1,063** | **35.6** | **1,191** | **730** |  |

**Notes:**

1. TCGA clinical XML drug records are known to be substantially incomplete, particularly for supportive care medications (antiemetics, PPIs, anticoagulants) which are rarely captured in tumour registry fields. The low documented exposure rates for CYP2D6/ondansetron and CYP2C19/clopidogrel reflect this systematic underreporting rather than true non-exposure.
2. For tumour-directed chemotherapy (DPYD/fluoropyrimidines, TPMT/thiopurines, CYP2D6/tamoxifen), documented exposure rates of 63–71% in the highest-priority cohorts confirm that a substantial majority of pharmacogene-LOF patients in these cancer types received the clinically relevant drug, supporting the prospective actionability framing.
3. These figures should be interpreted as lower bounds on true exposure prevalence given record incompleteness.

LOF, Loss-of-Function; CPIC, Clinical Pharmacogenomics Implementation Consortium; CINV, Chemotherapy-Induced Nausea and Vomiting; 5-FU, 5-Fluorouracil; 6-MP, 6-Mercaptopurine; AZA, Azathioprine; TG, Thioguanine; COAD, Colon Adenocarcinoma; STAD, Stomach Adenocarcinoma; BRCA, Breast Invasive Carcinoma; LAML, Acute Myeloid Leukaemia; TCGA, The Cancer Genome Atlas; PPI, Proton Pump Inhibitor.
