# Supplementary material
Source: Research Square preprint supplement (doi:10.21203/rs.3.rs-9414766/v1)
Supplement: Supplementary file 2 [file 70b832a786c4a2091dae1707.docx]

**Table 1. Study Design: Databases, Versions, and Scope**

| **Component** | **Resource** | **Scope / Version** |
| --- | --- | --- |
| Somatic mutation calls | GDC Data Portal (TCGA open-access) | MC3 MAF; 33 tumour types; n = 10,967 tumours; SNV + Indel |
| Pharmacogene star-allele definitions | PharmVar v6.1 | CYP2D6, CYP2C19, DPYD, TPMT – curated variant-to-function tables |
| Clinical actionability | CPIC Guidelines v1.16 | Levels A & B gene-drug pairs; prescribing recommendations |
| Variant pathogenicity | ClinVar (Dec 2024) | Germline + somatic submissions; P/LP annotation |
| Population allele frequencies | gnomAD v4.1 | Non-cancer constraint metrics (pLI, Z-score); AF stratification |
| Phenotype override modelling | Custom R pipeline (v4.3.1) | Tumour-acquired LOF vs. germline metabolizer simulation |

GDC, Genomic Data Commons; TCGA, The Cancer Genome Atlas; MAF, Mutation Annotation Format; LOF, Loss-of-Function; AF, Allele Frequency; CPIC, Clinical Pharmacogenomics Implementation Consortium.

**Table 2. Somatic Pharmacogene LOF Disruption Frequencies by Tumour Type (% of Tumours)**

| **Tumour Type (TCGA Code)** | **CYP2D6 LOF %** | **CYP2C19 LOF %** | **DPYD LOF %** | **TPMT LOF %** | **≥1 Gene Disrupted %** |
| --- | --- | --- | --- | --- | --- |
| Stomach adenocarcinoma (STAD) | 18.4 | 11.7 | 6.2 | 3.1 | 34.1 |
| Uterine corpus carcinoma (UCEC) | 15.9 | 9.8 | 5.4 | 2.8 | 29.6 |
| Colon adenocarcinoma (COAD) | 14.7 | 8.5 | 22.3* | 4.4 | 42.8* |
| Lung adenocarcinoma (LUAD) | 12.3 | 7.1 | 3.8 | 2.2 | 22.4 |
| Skin melanoma (SKCM) | 11.8 | 6.4 | 4.1 | 1.9 | 21.7 |
| Breast invasive carcinoma (BRCA) | 9.6 | 5.2 | 3.6 | 1.7 | 17.3 |
| Bladder urothelial carcinoma (BLCA) | 8.9 | 7.3 | 4.9 | 2.5 | 20.1 |
| Glioblastoma multiforme (GBM) | 7.2 | 5.9 | 2.1 | 6.4 | 18.8 |
| Prostate adenocarcinoma (PRAD) | 6.4 | 4.1 | 1.8 | 1.2 | 12.3 |
| Acute myeloid leukaemia (LAML) | 5.1 | 4.8 | 3.2 | 14.9* | 26.1* |
| **Pan-cancer aggregate** | **10.7** | **7.2** | **5.9** | **3.4** | **23.8** |

LOF, Loss-of-Function; *, significantly elevated relative to pan-cancer aggregate (FDR q < 0.05 by Fisher's exact test with Benjamini-Hochberg correction). Abbreviations: STAD, Stomach Adenocarcinoma; UCEC, Uterine Corpus Endometrial Carcinoma; COAD, Colon Adenocarcinoma; LUAD, Lung Adenocarcinoma; SKCM, Skin Cutaneous Melanoma; BRCA, Breast Invasive Carcinoma; BLCA, Bladder Urothelial Carcinoma; GBM, Glioblastoma Multiforme; PRAD, Prostate Adenocarcinoma; LAML, Acute Myeloid Leukaemia.

**Table 3. CPIC Level A Actionability of Somatic Pharmacogene LOF: Gene-Drug Pairs and Clinical Recommendations**

| **Pharmacogene** | **Drug(s) Affected** | **CPIC Level** | **LOF Phenotype** | **Affected Tumours (n)** | **Clinical Recommendation** |
| --- | --- | --- | --- | --- | --- |
| CYP2D6 | Tamoxifen, Codeine, Tramadol | A | Poor Metabolizer | 1,174 | Avoid tamoxifen; use aromatase inhibitor |
| CYP2D6 | Ondansetron, Tropisetron | A | Poor Metabolizer | 1,174 | Select alternative antiemetic |
| CYP2C19 | Clopidogrel | A | Poor Metabolizer | 790 | Use prasugrel or ticagrelor |
| CYP2C19 | Proton pump inhibitors | A | Poor Metabolizer | 790 | Increase PPI dose |
| DPYD | 5-Fluorouracil, Capecitabine | A | Reduced function | 647 | Dose reduction ≥50% or alternative |
| DPYD | Tegafur | A | No function | 647 | Contraindicated; use alternative |
| TPMT | Azathioprine, 6-MP, Thioguanine | A | Poor Metabolizer | 373 | Reduce dose 10-fold; weekly CBC |

LOF, Loss-of-Function; CPIC, Clinical Pharmacogenomics Implementation Consortium; 5-FU, 5-Fluorouracil; 6-MP, 6-Mercaptopurine; PPI, Proton Pump Inhibitor; CBC, Complete Blood Count. All listed recommendations are derived from CPIC guidelines at the Level A evidence tier (strong, sufficient evidence to recommend clinical action).

**Table 4. Phenotype Override Matrix: Effective Metaboliser Phenotype Under Combined Germline and Somatic LOF**

| **Germline Phenotype** | **Tumour LOF Detected** | **Predicted Functional Phenotype** | **Magnitude of Shift** | **Clinical Implication** |
| --- | --- | --- | --- | --- |
| Normal Metabolizer (NM) | Somatic CYP2D6 LOF | Effective Poor Metabolizer | High (full enzyme loss) | Tamoxifen failure risk; antiemetic re-evaluation |
| Intermediate Metabolizer (IM) | Somatic CYP2D6 LOF | Effective Poor Metabolizer | Moderate–High | Accelerated phenotype shift; dosing risk |
| Normal Metabolizer (NM) | Somatic CYP2C19 LOF | Effective Poor Metabolizer | High | Clopidogrel resistance; PPI underdosing |
| Normal Metabolizer (NM) | Somatic DPYD LOF | Partial/Complete Deficiency | High (50–100% capacity loss) | 5-FU/capecitabine severe toxicity risk |
| Normal TPMT Function | Somatic TPMT LOF | Effective Poor Metabolizer | High | Thiopurine myelosuppression; dose reduction mandatory |
| Ultra-rapid Metabolizer (UM) | Somatic CYP2D6 LOF | Normalised or reduced function | Variable | Risk reduction but unpredictable kinetics |
| Poor Metabolizer (PM) | Somatic CYP2D6 amplification* | Partial phenotype rescue | Low–Moderate | Rare; theoretical kinetics shift only |

LOF, Loss-of-Function; NM, Normal Metaboliser; IM, Intermediate Metaboliser; PM, Poor Metaboliser; UM, Ultra-Rapid Metaboliser. *Somatic CYP2D6 amplification was observed in <0.5% of tumours and represents a rare theoretical event without confirmed pharmacokinetic validation. Magnitude of shift reflects the delta in predicted activity score; clinical implication is based on CPIC Level A prescribing guidance for the relevant germline phenotype-to-effective phenotype transition.
